# Supplementary material
Source: publisher site journal article supplement (https://www.dovepress.com/article/599816)
Supplement: Supplementary file 1 [file 599816%20Revised%20supplementary.docx]

**SUPPLEMENTARY**

**Supplement 1. Details of Cost and Utility Value Calculations**

We obtained data on medical costs related to cataract surgery from hospital billing records and patient service invoices (billing data) in the Electronic Medical Record of King Chulalongkorn Memorial Hospital (KCMH) with the approval of the Director of KCMH (Approval Number: ECC 417/2567).

Direct medical costs include constant costs (comprising operation fee, anesthesia, intraocular lens (IOL), and surgeon’s fees), outpatient department (OPD) visit costs, medications, and other consumable medical supplies.

- Constant costs: At KCMH, certain costs, such as operation, anesthesia, surgeon fee, and IOL cost, are determined per eye of surgery. Therefore, the total costs for these components are considered equal between ISBCS and DSBCS for economic evaluation.
- Medication costs: Included all essential medications for postoperative care and adverse events treatment within the 3-month follow-up period (e.g., antibiotics, anti-inflammatory agents, anti-glaucoma medications, anti-VEGF injections, etc.)
- OPD visit costs: Determined per OPD visit for postoperative follow-up
- Other costs: Included additional investigations or procedures necessary for postoperative examination, treatment, and follow-up (e.g., dilating pupil, OCT scans, fundus photos, YAG capsulotomy laser, etc.). This category also encompasses medical consumables and disposables used during surgery and postoperative care.

From the societal perspective, costs were adjusted from billing data as follows: Surgical costs (including operation, anesthesia, and surgeon’s fee) were calculated based on actual health insurance reimbursement, reflecting the real economic cost to society. IOL costs were also based on reimbursement. For other components, including OPD visits, postoperative medications, and consumable medical supplies, costs were adjusted using the general cost-to-charge ratio (CCR) of approximately 0.865 for a tertiary hospital in Thailand.

**Direct medical costs at the King Chulalongkorn Memorial Hospital, Bangkok, Thailand**

| **Cost components** | **Billing data a** | **Adjusted cost for the societal perspective** |
| --- | --- | --- |
| Operation cost | 12,000 THB/eye | 7,000 THB/eye b |
| Anesthesia | 1,000 THB/eye | 0 THB |
| IOL | Various | 2,800 THB/eye b |
| Surgeon fee | 13,000 THB/eye | 0 THB |
| OPD | Various | Cost-to-charge ratio c |
| Drugs | Various | Cost-to-charge ratio c |
| Others | Various | Cost-to-charge ratio c |

a,b,c Sources: a KCMH electronic medical record

b Reimbursement by the Thai Universal Coverage Scheme

c Adjusted by the cost-to-charge ratio of a tertiary hospital in Thailand, 0.865.

**Direct non-medical cost**

- Travel: The travel cost was calculated using the Thai government’s compensation rate for personal vehicle use (4 THB/km in 2007) adjusted for inflation using the Consumer Price Index (CPI). With CPI values for 2007 (83.90) and 2023 (107.78), the adjusted rate was 5.14 THB/km.

The patient’s home-to-hospital distance was determined by interviewing. If the patient can not answer, the researcher will use Google Maps to measure the shortest distance to the patient’s address.

Travel cost = 5.14 × distance × time of hospital visit × 2

- Food: The average price of one meal at the KCMH food court is approximately 60 THB. Thus, the estimated food cost per visit for two people (patient and escort) is 120 THB.

Food cost = 120 × time of hospital visit

- Caregiver costs: If a caregiver was hired, the fee per hospital visit was calculated based on the average daily wage in Bangkok (353 THB/day). For patients accompanied by a relative, the caregiver cost was treated as an indirect cost due to the relative’s potential loss of work.

**Indirect Costs**

Indirect costs in this analysis represent the income lost when patients and their relatives take time off work for surgery and follow-up. These costs are calculated as follows:

- Patient’s time off: The total number of days the patient was unable to work was calculated by summing the assumed recovery period (7 days, as mentioned previously) and the number of hospital visits required for the surgery and follow-up within the 3-month study period. To avoid double-counting, post-operative follow-up visits occurring within the initial 7-day recovery phase (specifically the Day 1 and Week 1 visits) were not included. Income loss is calculated only for patients of working age (≤ 60 years), using the minimum daily wage for manual labor in Bangkok (353 THB/day). For retired patients (> 60 years), indirect costs are 0 THB.
- Relative’s time off: The total number of days a relative (assumed as one escort per visit) took off work was equated to the total number of hospital visits the patient made for surgery and all follow-up appointments within the 3-month study period. Income loss for relatives is also calculated using the minimum daily wage (353 THB/day). The income loss of the relative was excluded from the patient perspective analysis, but was included in the societal perspective analysis.

The 3-month postoperative follow-up period for this study was selected because this timeframe is widely regarded as a standard healing period for cataract surgery in clinical practice.

**QALYs calculation**

Patients were interviewed at three time points to assess utility scores: before surgery for the first eye (utility_1), one week after the first-eye surgery (utility_2), and three months after the second-eye surgery (utility_3).

A 3-month time horizon was chosen for this study as it captures all relevant differences in cost and effectiveness between the ISBCS and DSBCS groups. The following assumptions were made:

- Utility_2 remains constant during the interval between the first and second eye surgeries.

- Utility_3 remains constant from three months post-second-eye surgery until the end of the one-year time horizon.

QALYs for each group were calculated following the formula:

QALYs = Utility value × Length of time (years)

- For ISBCS: QALYs = utility_3 × 0.25.

- For DSBCS: QALYs = (utility_2 × interval) + (utility_3 × (0.25 - interval))

With:

- “Interval” represents the duration between the first and second eye surgeries for DSBCS patients.
- “0.25” represents 3 months, equivalent to one-quarter of a year

**Supplement 2. Postoperative complications**

| **Complication** | **DSBCS**  **(n = 45)** | **ISBCS**  **(n = 44)** | **P-value** |
| --- | --- | --- | --- |
| Transient ocular hypertension | 8 (17.78%) | 10 (22.72%) | 0.572 |
| 1 eye | 7 (15.6%) | 7 (15.9%) |  |
| 2 eyes | 1 (2.22 %) | 3 (6.82%) |  |
| Transient corneal edema | 5 (11.11%) | 0 (0%) | 0.075 |
| 1 eye | 4 (8.89%) | 0 (0%) |  |
| 2 eyes | 1 (2.22%) | 0 (0%) |  |
| Posterior capsule opacification | 0 (0%) | 1 (2.27%) | 0.991 |
| Cystoid macular edema | 1 (2.22 %) | 0 (0%) | 1.000 |

**Notes:**

**Abbreviations:** DSBCS, delayed sequential bilateral cataract surgery; ISBCS, immediate sequential bilateral cataract surgery
